# Supplementary material for: Water-soluble photoluminescent d-mannose and l-alanine functionalized silicon nanocrystals and their application to cancer cell imaging
Source: Royal Society of Chemistry journal article supplement (doi:10.1039/c4tb01161a), 2014-01-01

# **Water-soluble Photoluminescent D-Mannose and L-Alanine Functionalized Silicon Nanocrystals and Their Application to Cancer Cell Imaging**

Yi Zhai, Mita Dasog, Ryan B. Snitynsky, Tapas K. Purkait, Maryam Aghajamali, Allison H. Hahn,  
Christopher B. Sturdy, Todd L. Lowary and Jonathan G. C. Veinot

## Figures

Fig. S1  $^1\text{H}$  and  $^{13}\text{C}$  NMR spectra of 1,2,3,4,6-penta-*O*-acetyl- $\alpha$ -D-mannopyranose.

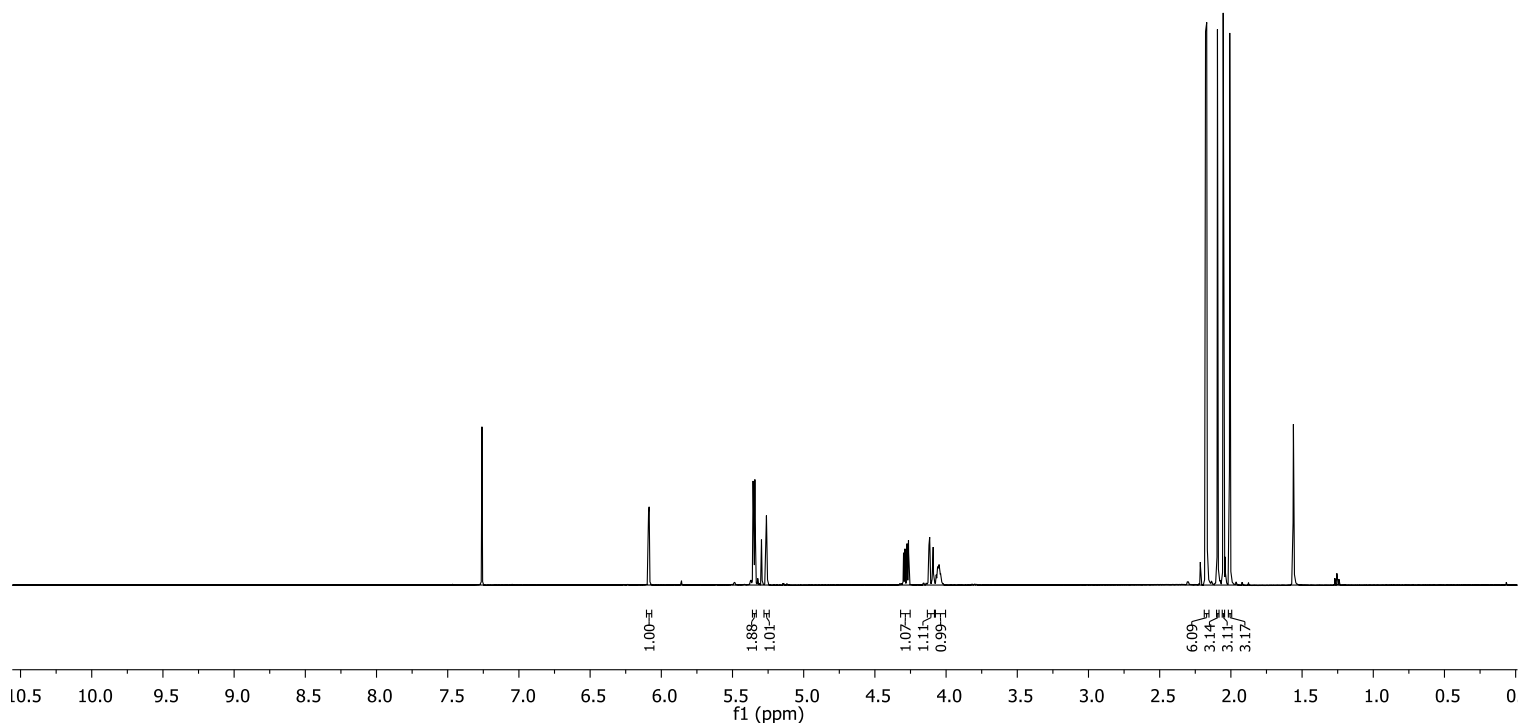

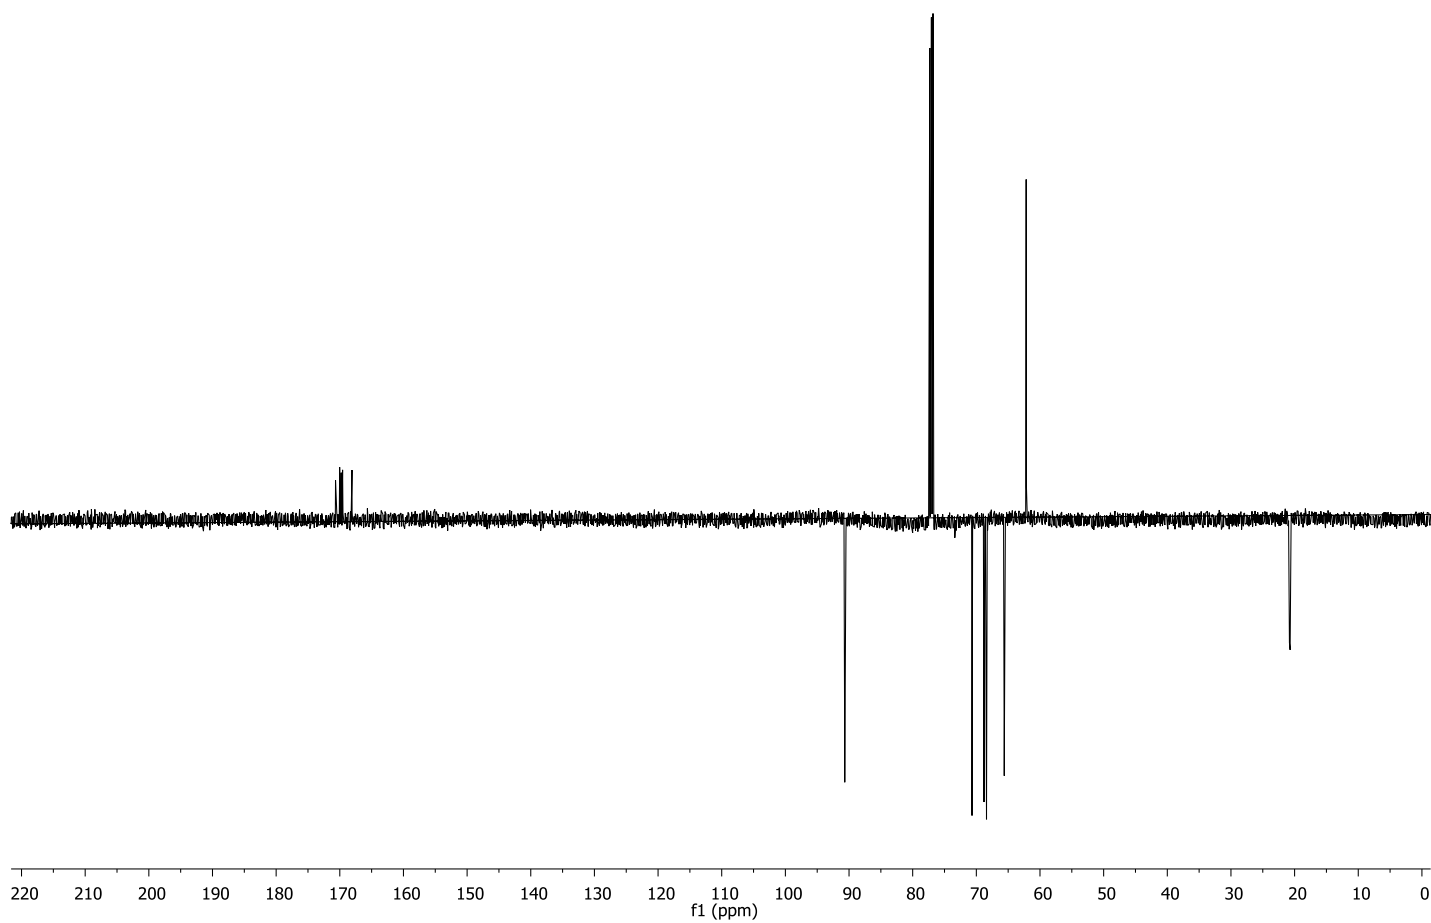

Fig. S2  $^1\text{H}$  and  $^{13}\text{C}$  NMR spectra of 2'-hydroxyethyl 2,3,4,6-tetra-*O*-acetyl- $\alpha$ -D-mannopyranoside.

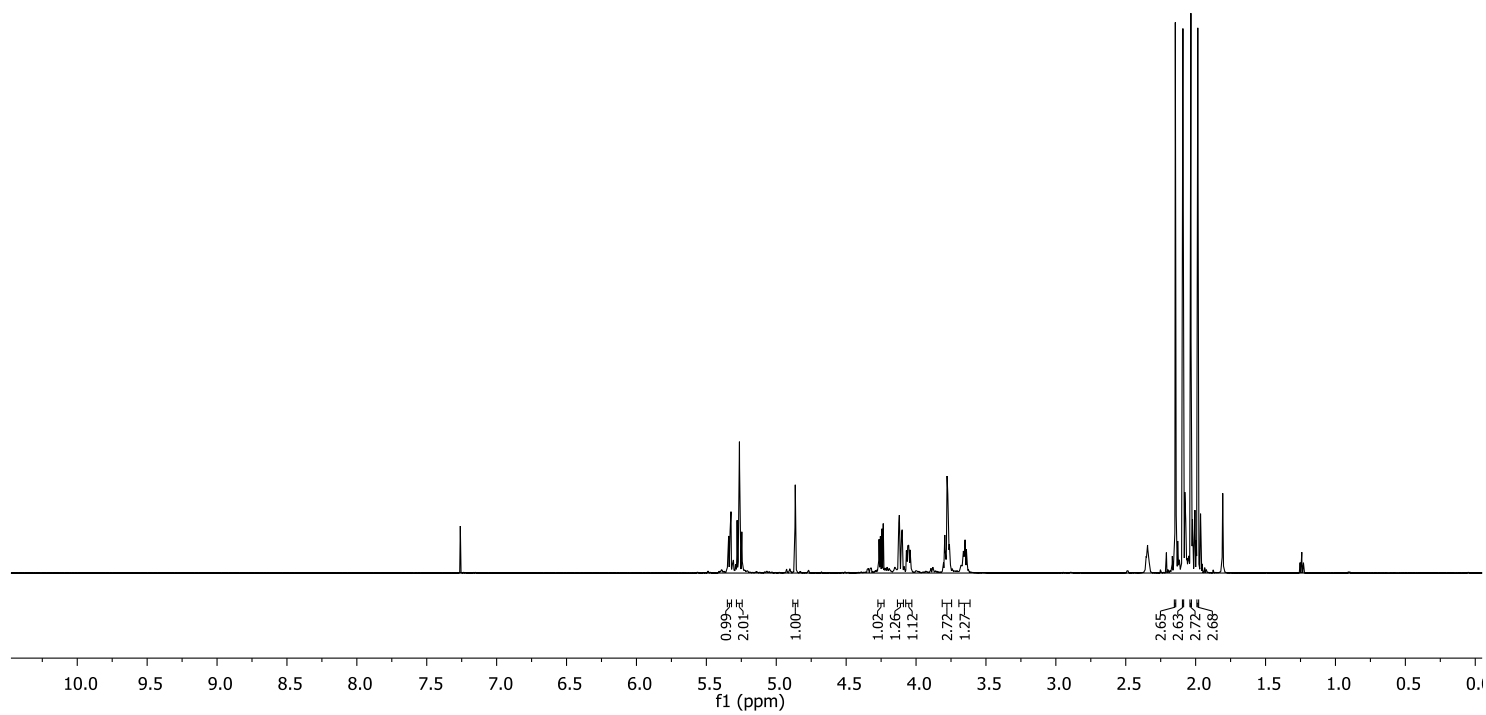

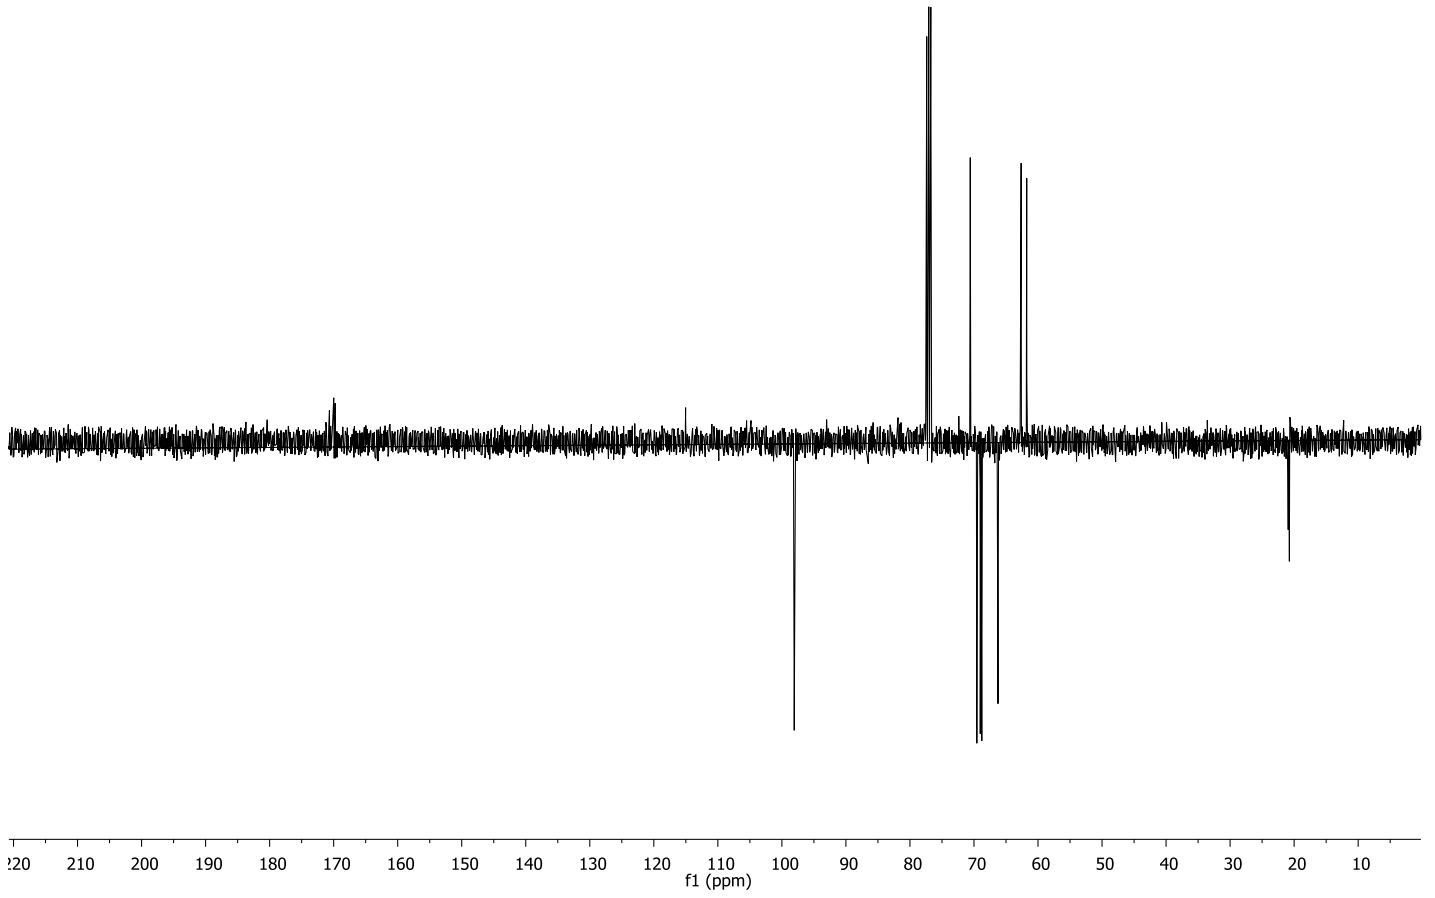

Fig. S3 Size distribution of mannose functionalized Si NCs with diameters of  $2.6 \pm 0.6$  nm and alanine functionalized Si NCs with diameters of  $2.7 \pm 0.5$  nm.

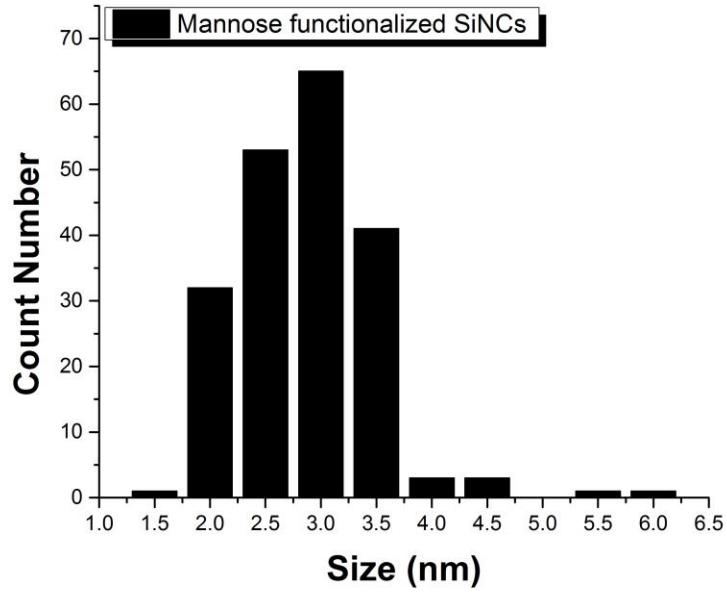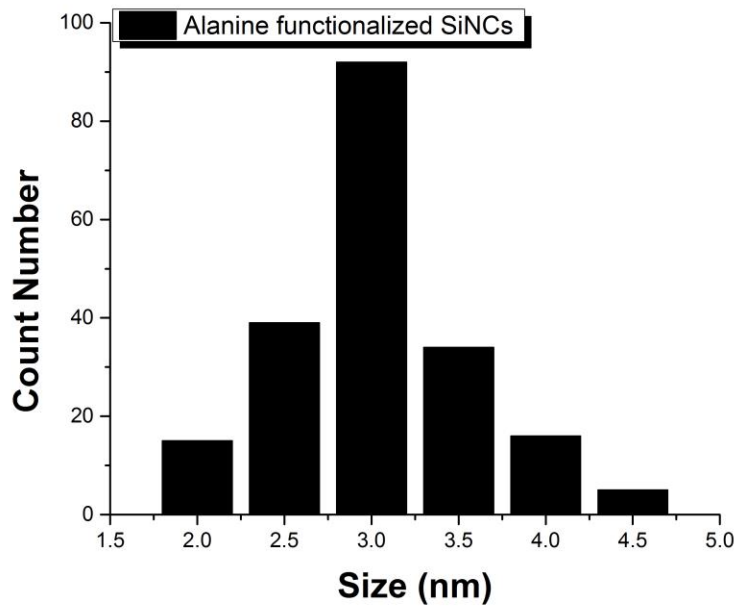

Fig. S4 DLS measurement of (A) mannose functionalized SiNCs, (B) alanine functionalized SiNCs, and (C) pentanoic acid functionalized SiNCs.

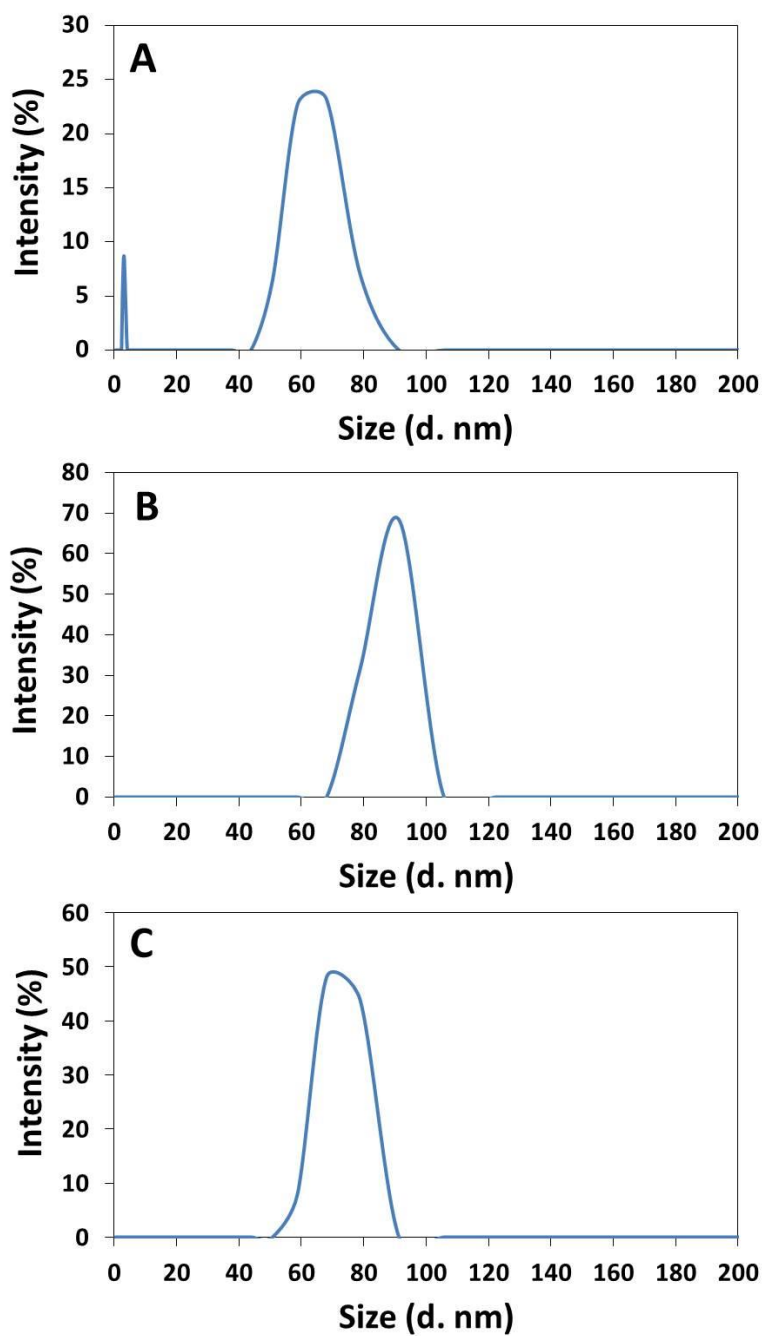

Fig. S5 XPS survey spectrum of mannose surface functionalized SiNCs and alanine surface functionalized SiNCs.

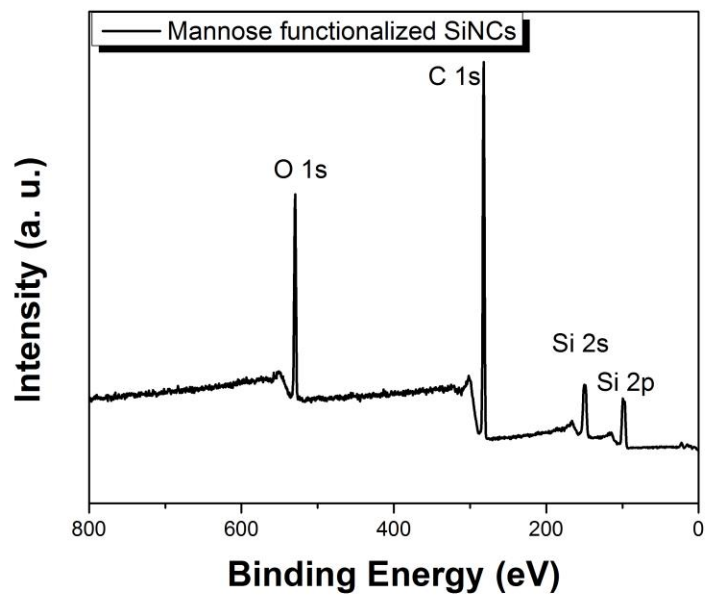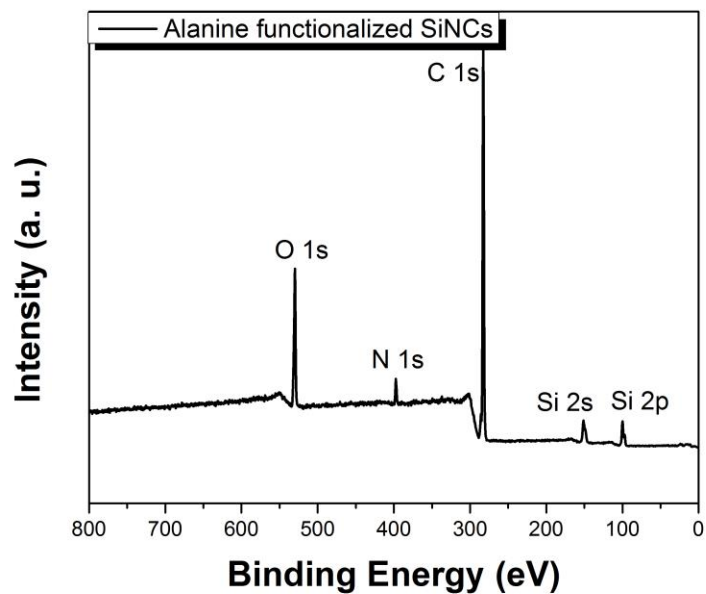



Fig. S6 FTIR spectra of pentanoic acid functionalized Si-NCs.

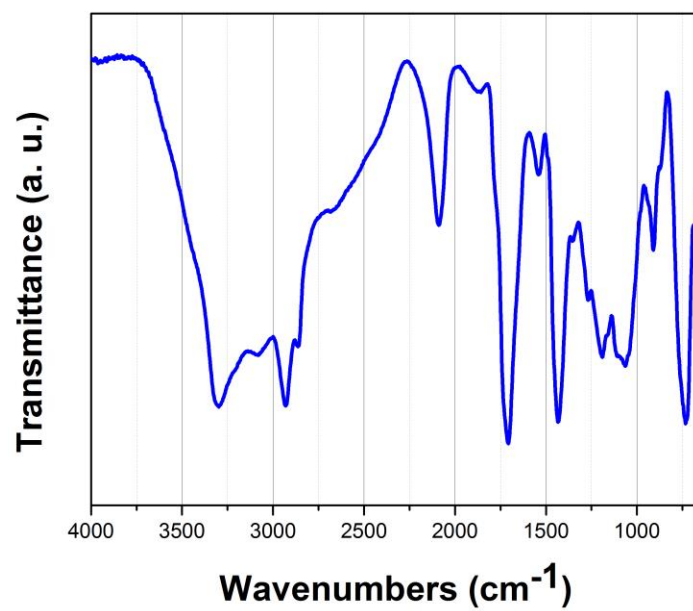

Fig. S7 TEM image of pentanoic acid functionalized SiNCs.

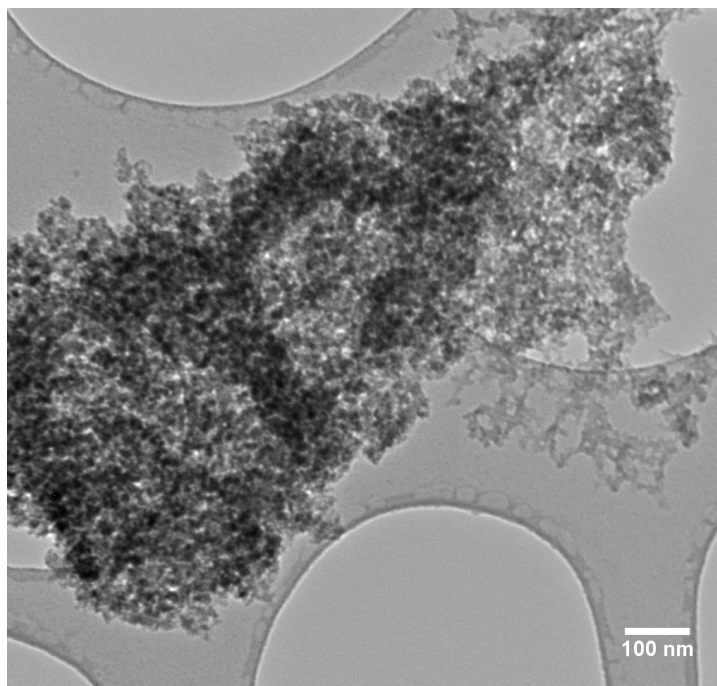

Supplement: c4tb01161a1.pdf [file c4tb01161a1.pdf]
